# Supplementary material for: Effectiveness of self-management applications in improving clinical health outcomes and adherence among diabetic individuals in low and middle-income countries: a systematic review
Source: PubMed Central journal article supplement — BMJ Open. 2022 Nov 15;12(11):e060108. doi: 10.1136/bmjopen-2021-060108 (PMC9668026; doi:10.1136/bmjopen-2021-060108), 2022-11-15
Supplement: bmjopen-2021-060108supp002.pdf [file bmjopen-2021-060108supp002.pdf]

| <b>Supplementary file: 2</b>                                                  |                                                                                                                                                                                                                                                                                                                                                                                                                                                                                                                                                                                                                                                                                                                                                                                                                                                                                                                                                                                                                                                                                                                                                                                                                                                                                                                                                                                                         |                           |
|-------------------------------------------------------------------------------|---------------------------------------------------------------------------------------------------------------------------------------------------------------------------------------------------------------------------------------------------------------------------------------------------------------------------------------------------------------------------------------------------------------------------------------------------------------------------------------------------------------------------------------------------------------------------------------------------------------------------------------------------------------------------------------------------------------------------------------------------------------------------------------------------------------------------------------------------------------------------------------------------------------------------------------------------------------------------------------------------------------------------------------------------------------------------------------------------------------------------------------------------------------------------------------------------------------------------------------------------------------------------------------------------------------------------------------------------------------------------------------------------------|---------------------------|
| <b>Database</b>                                                               | <b>Search strategy</b>                                                                                                                                                                                                                                                                                                                                                                                                                                                                                                                                                                                                                                                                                                                                                                                                                                                                                                                                                                                                                                                                                                                                                                                                                                                                                                                                                                                  | <b>Hits</b>               |
| 1<br>PubMed                                                                   | Search: (("diabetes mellitus, type 2"[MeSH Terms] OR "self-management/education"[MeSH Major Topic]) AND "Mobile Applications"[MeSH Major Topic] AND "english"[Language] AND "english"[Language]) AND ((fha[Filter]) AND (clinicaltrial[Filter] OR randomized controlled trial[Filter] OR review[Filter]) AND (humans[Filter]) AND (english[Filter]))                                                                                                                                                                                                                                                                                                                                                                                                                                                                                                                                                                                                                                                                                                                                                                                                                                                                                                                                                                                                                                                    | <a href="#">68</a>        |
| 2<br>World Bank list of low and middle income countries included in the study | Search: ("Afghanistan"[All Fields] OR "Albania"[All Fields] OR "Algeria"[All Fields] OR "American"[All Fields] OR "Samoa"[All Fields] OR "Angola"[All Fields] OR "Argentina"[All Fields] OR "Armenia"[All Fields] OR "Azerbaijan"[All Fields] OR "Bangladesh"[All Fields] OR "Belarus"[All Fields] OR "Belize"[All Fields] OR "Benin"[All Fields] OR "Bhutan"[All Fields] OR "Bolivia"[All Fields] OR "Bosnia"[All Fields] OR "Herzegovina"[All Fields] OR "Botswana"[All Fields] OR "Brazil"[All Fields] OR "Bulgaria"[All Fields] OR "Burkina"[All Fields] OR "Faso"[All Fields] OR "Burundi"[All Fields] OR "Cabo"[All Fields] OR "Verde"[All Fields] OR "Cambodia"[All Fields] OR "Cameroon"[All Fields] OR "Central"[All Fields] OR "African"[All Fields] OR "Republic"[All Fields] OR "Chad"[All Fields] OR "China"[All Fields] OR "Colombia"[All Fields] OR "Comoros"[All Fields] OR "Congo"[All Fields] OR "dem"[All Fields] OR "rep"[All Fields] OR "Congo"[All Fields] OR "rep"[All Fields] OR "Costa"[All Fields] OR "Rica"[All Fields] OR "Cote"[All Fields] OR "d'Ivoire"[All Fields] OR "Cuba"[All Fields] OR "Djibouti"[All Fields] OR "Dominica"[All Fields] OR "Dominican"[All Fields] OR "Republic"[All Fields] OR "Ecuador"[All Fields] OR "Egypt"[All Fields] OR "Arab"[All Fields] OR "rep"[All Fields] OR "El"[All Fields] OR "Salvador"[All Fields] OR "Equatorial"[All Fields]) | <a href="#">5,860,984</a> |
| 1 & 2<br>(2016-2022)                                                          | Search: (((("diabetes mellitus, type 2"[MeSH Terms] OR "self-management/education"[MeSH Major Topic]) AND "Mobile Applications"[MeSH Major Topic] AND "english"[Language] AND "english"[Language]) AND ((fha[Filter]) AND (clinicaltrial[Filter] OR randomized controlled trial[Filter] OR review[Filter]) AND (humans[Filter]) AND (english[Filter]))) AND (("Afghanistan"[All Fields] OR "Albania"[All Fields] OR "Algeria"[All Fields] OR "American"[All Fields] OR "Samoa"[All Fields] OR "Angola"[All                                                                                                                                                                                                                                                                                                                                                                                                                                                                                                                                                                                                                                                                                                                                                                                                                                                                                              | <a href="#">15</a>        |

|  |                                                                                                                                                                                                                                                                                                                                                                                                                                                                                                                                                                                                                                                                                                                                                                                                                                                                                                                                                                                                                                                                                                                                                                                                                                                                                                                          |  |
|--|--------------------------------------------------------------------------------------------------------------------------------------------------------------------------------------------------------------------------------------------------------------------------------------------------------------------------------------------------------------------------------------------------------------------------------------------------------------------------------------------------------------------------------------------------------------------------------------------------------------------------------------------------------------------------------------------------------------------------------------------------------------------------------------------------------------------------------------------------------------------------------------------------------------------------------------------------------------------------------------------------------------------------------------------------------------------------------------------------------------------------------------------------------------------------------------------------------------------------------------------------------------------------------------------------------------------------|--|
|  | Fields] OR "Argentina"[All Fields] OR "Armenia"[All Fields] OR "Azerbaijan"[All Fields] OR "Bangladesh"[All Fields] OR "Belarus"[All Fields] OR "Belize"[All Fields] OR "Benin"[All Fields] OR "Bhutan"[All Fields] OR "Bolivia"[All Fields] OR "Bosnia"[All Fields] OR "Herzegovina"[All Fields] OR "Botswana"[All Fields] OR "Brazil"[All Fields] OR "Bulgaria"[All Fields] OR "Burkina"[All Fields] OR "Faso"[All Fields] OR "Burundi"[All Fields] OR "Cabo"[All Fields] OR "Verde"[All Fields] OR "Cambodia"[All Fields] OR "Cameroon"[All Fields] OR "Central"[All Fields] OR "African"[All Fields] OR "Republic"[All Fields] OR "Chad"[All Fields] OR "China"[All Fields] OR "Colombia"[All Fields] OR "Comoros"[All Fields] OR "Congo"[All Fields] OR "dem"[All Fields] OR "rep"[All Fields] OR "Congo"[All Fields] OR "rep"[All Fields] OR "Costa"[All Fields] OR "Rica"[All Fields] OR "Cote"[All Fields] OR "d'Ivoire"[All Fields] OR "Cuba"[All Fields] OR "Djibouti"[All Fields] OR "Dominica"[All Fields] OR "Dominican"[All Fields] OR "Republic"[All Fields] OR "Ecuador"[All Fields] OR "Egypt"[All Fields] OR "Arab"[All Fields] OR "rep"[All Fields] OR "El"[All Fields] OR "Salvador"[All Fields] OR "Equatorial"[All Fields]) Filters: Abstract, Clinical Trial, Randomized Controlled Trial, Review |  |
|--|--------------------------------------------------------------------------------------------------------------------------------------------------------------------------------------------------------------------------------------------------------------------------------------------------------------------------------------------------------------------------------------------------------------------------------------------------------------------------------------------------------------------------------------------------------------------------------------------------------------------------------------------------------------------------------------------------------------------------------------------------------------------------------------------------------------------------------------------------------------------------------------------------------------------------------------------------------------------------------------------------------------------------------------------------------------------------------------------------------------------------------------------------------------------------------------------------------------------------------------------------------------------------------------------------------------------------|--|
