# Supplementary material for: Effectiveness of self-management applications in improving clinical health outcomes and adherence among diabetic individuals in low and middle-income countries: a systematic review
Source: PubMed Central journal article supplement — BMJ Open. 2022 Nov 15;12(11):e060108. doi: 10.1136/bmjopen-2021-060108 (PMC9668026; doi:10.1136/bmjopen-2021-060108), 2022-11-15
Supplement: bmjopen-2021-060108supp003.pdf [file bmjopen-2021-060108supp003.pdf]

## Supplementary file: 3

## III. Data extraction from

|                                                 |                                                                                                                                                                                  |
|-------------------------------------------------|----------------------------------------------------------------------------------------------------------------------------------------------------------------------------------|
| Title of the study                              |                                                                                                                                                                                  |
| Authors                                         |                                                                                                                                                                                  |
| The Year of the study conducted                 |                                                                                                                                                                                  |
| Year of publication                             |                                                                                                                                                                                  |
| Doi & Journal                                   |                                                                                                                                                                                  |
| Objectives of the study                         |                                                                                                                                                                                  |
| Participant characteristics                     | Number of participants<br>Age<br>Gender<br>Ethnicity<br>Socioeconomic group<br>Educational status<br>Duration of T2DM                                                            |
| Total number of participants                    |                                                                                                                                                                                  |
| Setting/ context/ country                       | Low-income country<br>Lower Middle-income country<br>Upper Middle-income country                                                                                                 |
| World Bank Region                               | South Asia<br>Sub-Saharan Africa<br>East Asia and the Pacific<br>Europe and Central Asia<br>Latin America and the Caribbean<br>The Middle East and North Africa<br>North America |
| Description of intervention for type 2 diabetes | M health application<br>Infographics<br>Video clips<br>Text messages<br>Others – to be specified                                                                                 |
| Search details                                  | Year                                                                                                                                                                             |
| Source                                          | IndMED<br>Medline Plus<br>OpenMED                                                                                                                                                |

|                             |                                                                                                 |
|-----------------------------|-------------------------------------------------------------------------------------------------|
|                             | Ovid Medline<br>PubMed / MEDLINE<br>Scopus<br>Web of Science<br>Other Bibliographical Databases |
| The range of years included | No limit                                                                                        |
| No of included studies      |                                                                                                 |
| Type of studies included    | RCT<br>Quasi-experimental study<br>Case-control<br>Cohort<br>Controlled trial                   |
| Comparator                  | Duration of the intervention<br>Across the regions (LMICs)<br>Age groups<br>Gender              |
| Analysis                    |                                                                                                 |
| Method of analysis          |                                                                                                 |
| follow up sessions          |                                                                                                 |
| Outcome assessed            | Primary<br>secondary                                                                            |
| Results/ findings           |                                                                                                 |
| Significance                |                                                                                                 |
| Heterogeneity if done       |                                                                                                 |
| Study Limitations           |                                                                                                 |
